# Supplementary material for: Exploring the barriers to early Antenatal Care initiation among pregnant women in a rural district of Northern Ghana
Source: Research Square preprint supplement (doi:10.21203/rs.3.rs-7837762/v1), 2025-11-24
Supplement: Supplementary file 1 [file 414c673ffdc7ebc3a221aee8.pdf]

## **APPENDIX B: INTERVIEW GUIDE**

### **SECTION A: Demographic Information**

Please tell me about yourself

Probes

1. Age of respondent
2. Occupation of respondent
3. Educational Background of respondent
4. Number of pregnancies of respondent
5. Household size of respondent
6. Religion of respondent
7. Residential area of respondent (rural or urban)
8. The educational background of the husband
9. Occupational status of husband

### **SECTION C: Barriers to early initiation of antenatal care**

1. Are there any financial constraints that contribute to the late initiation of antenatal care in your community? Please describe them.
2. How do these financial constraints impact the decision to delay seeking antenatal care
3. Are there transportation-related barriers that prevent pregnant individuals from accessing antenatal care services in your community? If yes, please describe them.
4. How does the lack of transportation options or difficulties in commuting impact the decision to delay seeking antenatal care?

5. Are there any cultural beliefs or practices in your community that affect the timing of antenatal care seeking? If yes, please describe them.
6. How do these cultural beliefs and practices influence the decision to delay the initiation of antenatal care?
7. Do social or family pressures play a role in delaying the initiation of antenatal care in your community? If yes, please provide examples.
